# Supplementary material for: NKAP is a novel RS-related protein that interacts with RNA and RNA binding proteins
Source: PubMed Central journal article supplement — Nucleic Acids Res. 2013 Dec 17;42(5):3177–93. doi: 10.1093/nar/gkt1311 (PMC3950704; doi:10.1093/nar/gkt1311), 2013-12-17
Supplement: supp_gkt1311_nar-00967-a-2013-File013.pdf [file supp_gkt1311_nar-00967-a-2013-File013.pdf]

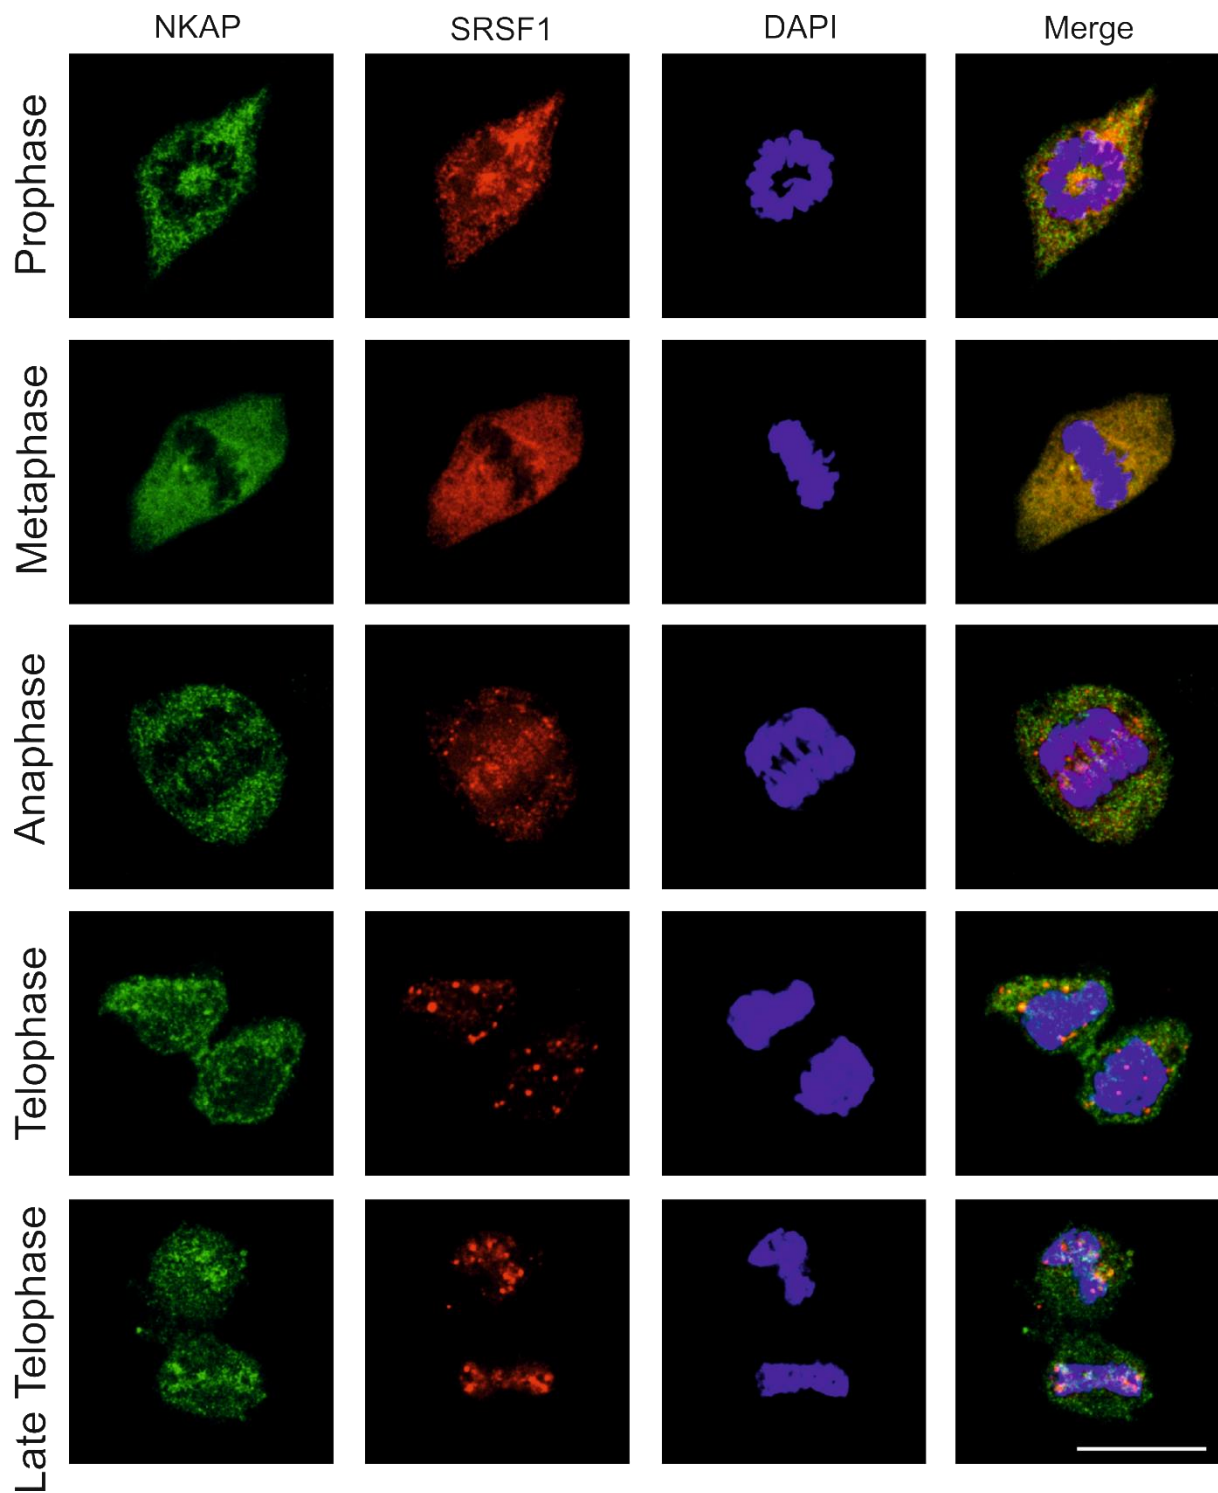

**Supplementary Figure 1. NKAP partially colocalizes with mitotic interchromatin granules (MIGs).** HeLa cells were treated with nocodazole, fixed using 4% PFA and stained for NKAP using mAB K85-80-5 and SRSF1 antibodies. Nuclei (blue) were stained with DAPI.

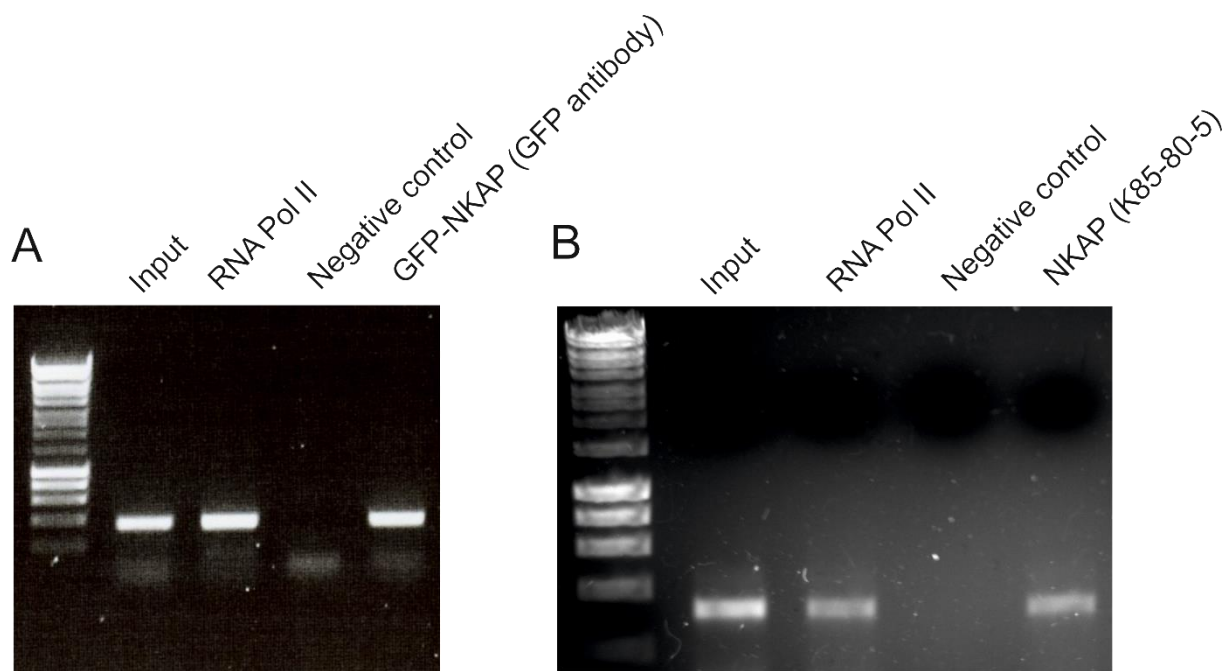

**Supplementary Figure 2. NKAP interacts with chromatin.** (A) Chromatin immunoprecipitation (ChIP) was performed on extracts from formaldehyde fixed HeLa cells expressing GFP-NKAP or GFP alone. DNA fragments purified from whole-cell extracts (Input) or co-precipitated with antibodies to pAb GFP or RNA Pol II were amplified by PCR using ASPM (Abnormal spindle-like microcephaly-associated protein) primers. (B) Chromatin immunoprecipitation was performed using monoclonal NKAP antibody (K85-80-5), RNA Pol II as a positive control and GFP antibody as a negative control.

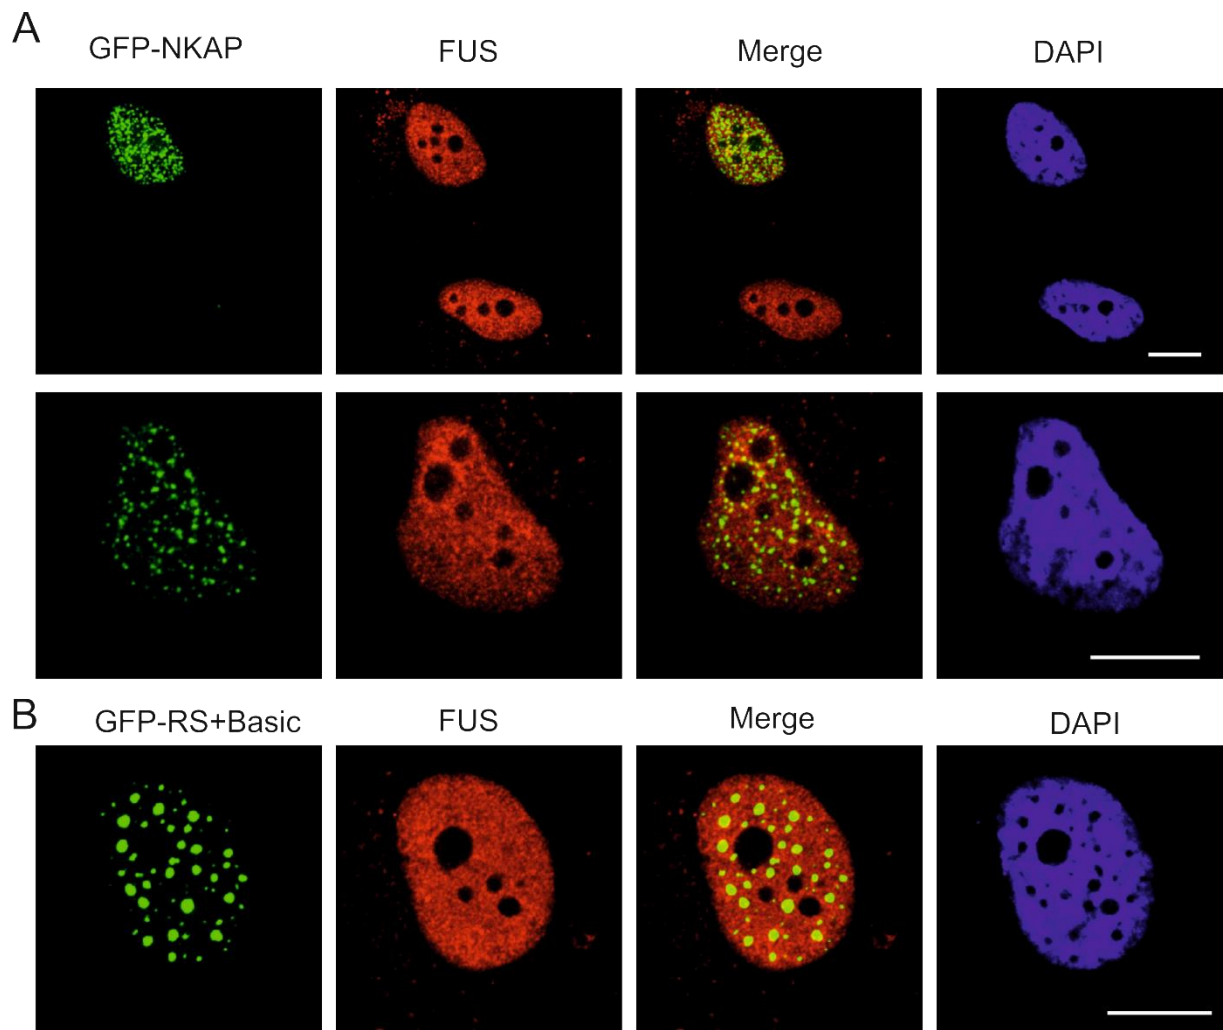

**Supplementary Figure 3. Overexpression of NKAP and RS+Basic did not alter FUS localization.** (A) HeLa cells expressing GFP-NKAP showed normal distribution of FUS/TLS. (B) Overexpression of GFP-RS+Basic did not alter FUS/TLS localization. Bar, 10  $\mu$ m.

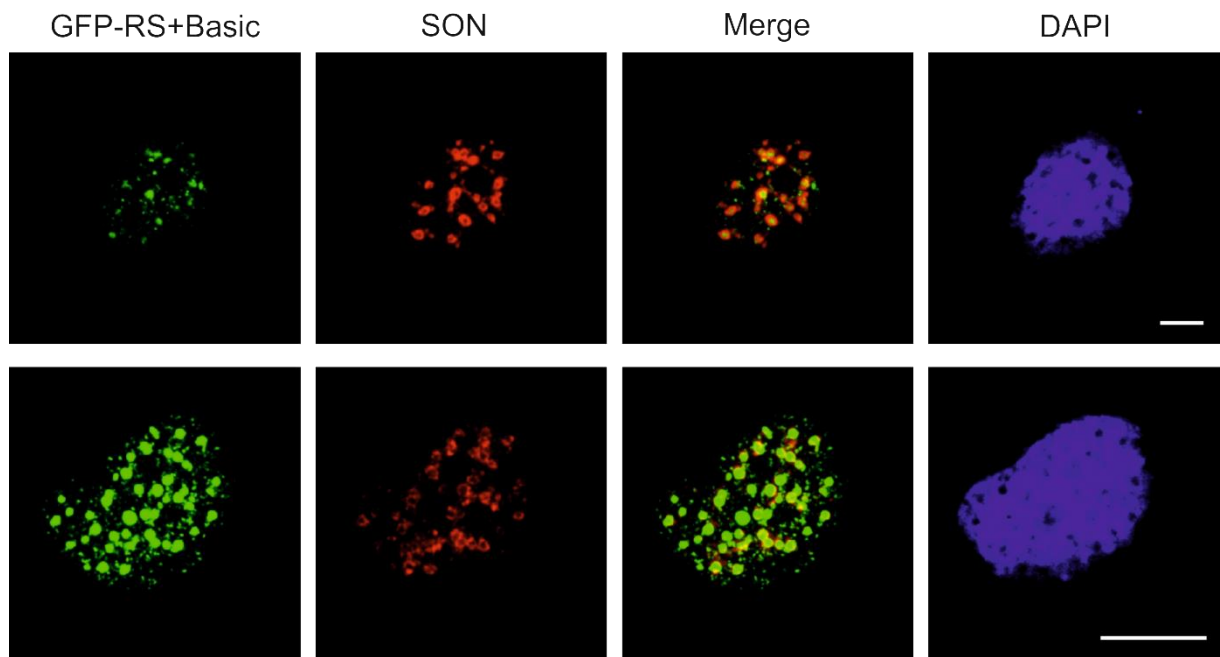

**Supplementary Figure 4. Overexpression of RS+Basic led to dough-nut like structures for SON.** Overexpression of GFP-RS+Basic altered SON localization which appeared in dough-nut like structures. Bar, 10  $\mu\text{m}$ .

**Table 1. Identification of interaction partners of NKAP.**

| Protein name                                   | Gene symbol | Unique peptides | Sequence coverage (%) |
|------------------------------------------------|-------------|-----------------|-----------------------|
| DNA-dependent protein kinase catalytic subunit | PRKDC       | 76              | 20.4                  |
| E3 ubiquitin-protein ligase                    | UBR5        | 4               | 4.1                   |
| Transferrin receptor protein 1                 | TFRC        | 19              | 30                    |
| 26S proteasome non-ATPase regulatory subunit   | PSMD2       | 7               | 11.6                  |
| Gamma-interferon-inducible protein             | IFI16       | 6               | 10                    |
| 4F2 cell-surface antigen heavy chain           | 4F2         | 4               | 11                    |
| WD repeat-containing protein 36                | WDR36       | 4               | 5.4                   |
| Exportin-2                                     | CSE1L       | 6               | 9.2                   |
| Ubiquitin-like modifier-activating enzyme      | UBA1        | 5               | 7                     |
| Major vault protein                            | MVP         | 7               | 11.2                  |
| Importin subunit beta-1                        | KPNB1       | 9               | 13.4                  |
| Transcription intermediary factor 1-beta       | TRIM28      | 4               | 6                     |
| Annexin A2                                     | ANXA1       | 8               | 12.8                  |
| Lamin-B1                                       | LMNB1       | 16              | 25.4                  |
| X-ray repair cross-complementing protein 6     | XRCC6       | 4               | 9.2                   |
| RNA-binding protein FUS (hnRNP P2)             | FUS         | 7               | 19.1                  |
| hnRNP A2/B1                                    | HNRNPA      | 14              | 45.3                  |
| hnRNP A1-like protein 2                        | HNRNPA      | 2               | 8.2                   |
| hnRNP M                                        | HNRPM       | 22              | 28.4                  |
| hnRNP L                                        | HNRPL       | 2               | 6.6                   |
| hnRNP U                                        | HNRPU       | 7               | 15.3                  |
| Splicing factor, proline- and glutamine-rich   | SFPQ        | 12              | 22.9                  |
| YTH domain family protein                      | YTHDF3      | 6               | 13.8                  |
| U5 small nuclear ribonucleoprotein 200 kDa     | SNRNP20     | 25              | 14.3                  |
| Nucleolar RNA helicase 2                       | DDX21       | 21              | 31.8                  |
| Probable ATP-dependent RNA helicase            | DDX27       | 5               | 9                     |
| ATP-dependent RNA helicase                     | DDX54       | 7               | 11.4                  |
| Probable ATP-dependent RNA helicase            | DDX17       | 4               | 8.7                   |
| Putative ribosomal RNA methyltransferase       | NOP2        | 5               | 8.3                   |
| Protein RRP5 homolog                           | PDCD11      | 6               | 9.2                   |
| HEAT repeat-containing protein 1               | HEATR1      | 5               | 8.1                   |

**Table 2. List of primers used in this study.**

|                   |                                       |
|-------------------|---------------------------------------|
| NKAP FW:          | 5'GAATTCATGGCTCCTGTATCGGGCTC3'        |
| NKAP RV:          | 5'GGATCCTCACTTGTCATCCTTCCCTTTG3'      |
| RS+Basic FW:      | 5'GAATTCATGGCTCCTGTATCGGGCTC3'        |
| RS+Basic RV       | 5'GTCGACTCATTCTTCTTGGGACTCTTTAGAGC 3' |
| NKAP RS FW        | 5'GAATTCATGGCTCCTGTATCGGGCTC3'        |
| NKAP RS RV        | 5'GTCGACCAGGCTAGGCCATGGCTTGTC3'       |
| NKAP basic FW     | 5'GAATTCCTGGACAAGGAAAGGGAGGAG3'       |
| NKAP basic RV     | 5'GTCGACTTCTTGGGACTCTTTAGAGCTC3'      |
| NKAP DUF Fw       | 5'GAATTCTTTCTAGAGAATCCTTGGAAGGATC 3'  |
| NKAP DUF RV       | 5' GTCGACTCACTTGTCATCCTTCCCTTTGG 3'   |
| QGSY FW           | 5'GAATTCATGGCTTCAAACGACTATACCC 3'     |
| QGSY RV           | 5'GGATCCACTGCTACTGTTGTACTGGTTC 3'     |
| G RICH+RGG1 FW    | 5'GAATTCGGAGGTGGTGGAGGGGGTG 3'        |
| G RICH+RGG1 RV    | 5'GTcGACACGAGATCCTTGATCCCGAGG 3'      |
| RGG2+ZnF+RGG3 FW  | 5'GAATTCGAGCTGACTTCAATCGGGG 3'        |
| RGG2+ZnF+RGG3 RV  | 5'GTCGACCTAATATGGCCTCTCCCTGCG 3'      |
| RGG1 FW           | 5'GAATTCGTGGGGGCCGAGGCAGG 3'          |
| RGG1 RV           | 5'GTcGACACGAGATCCTTGATCCCGAGG 3'      |
| RGG2 FW           | 5'GAATTCGAGCTGACTTCAATCGGGG 3'        |
| RGG2 RV           | 5'GTCGACTTGCTGTCCTCCACCTCCAC 3'       |
| RGG3 FW           | 5'GAATTCGGCCCAGGAGGGGGACCAG 3'        |
| RGG3 RV           | 5'GTCGACCTAATATGGCCTCTCCCTGCG 3'      |
| GAPDH mRNA FW     | 5' GACTGTGGATGGCCCCCTCCGG3'           |
| GAPDH mRNA RV     | 5'GTCAGAGGAGACCACCTGGTGC3'            |
| GAPDH pre-mRNA FW | 5' GTTCTGGGGACTGGCTTTCC3'             |
| GAPDH pre-mRNA RV | 5'CTAGACGGCAGGTCAGGTCC3               |
| NKAP shRNA4       | 5'AAGTGAGAGAGAGAGAATTGGAGAATTGG 3'    |
| NKAP shRNA5       | 5' AATCCTGAACCAGATTCTGATGAACATAC 3'   |
